# Supplementary material for: Microstimulation of primate neocortex targeting striosomes induces negative decision-making
Source: bioRxiv or medRxiv preprint supplement (doi:10.1101/668194), 2019-06-12
Supplement: Supplementary file [file media-2.pdf]

**Supplementary Table 1.** Summary of monkeys used in this study and the experimental procedures applied to each monkey. L: left hemisphere, R: right hemisphere. F: female, M: male. Data from the left hemisphere of monkey Y with cOFC injection were not included due to the leakage of virus tracer to other cortical regions.

| Monkey name (sex) | Stimulation during ApAv | Recording during ApAv | fMRI with stimulation | Virus injection (total amount)                                                                       |
|-------------------|-------------------------|-----------------------|-----------------------|------------------------------------------------------------------------------------------------------|
| Monkey S (F)      | L & R pACC              | R pACC                | No                    | AAVDJ-CMV-hrGFP in LpACC (0.9 $\mu$ l)                                                               |
| Monkey P (F)      | LpACC, and LcOFC        | LpACC, and LcOFC      | No                    | No                                                                                                   |
| Monkey A (F)      | No                      | No                    | No                    | AAVDJ-CMV-hrGFP in RpACC (1.5 $\mu$ l)<br>AAVDJ-CMV-mCherry in RcOFC (1 $\mu$ l)                     |
| Monkey Y (F)      | RpACC, and L & R cOFC   | No                    | No                    | AAVDJ-CMV-mCherry in RpACC (2 $\mu$ l)<br>*AAVDJ-CMV-hrGFP in LcOFC (1.4 $\mu$ l) *Data not included |
| Monkey N (M)      | No                      | No                    | RpACC, and RcOFC      | AAVDJ-CMV-mCherry in RpACC (1 $\mu$ l)<br>AAVDJ-CMV-hrGFP in RcOFC (0.9 $\mu$ l)                     |
| Monkey I (M)      | No                      | No                    | No                    | AAVDJ-CMV-mCherry in LvCMA (1.4 $\mu$ l)                                                             |
